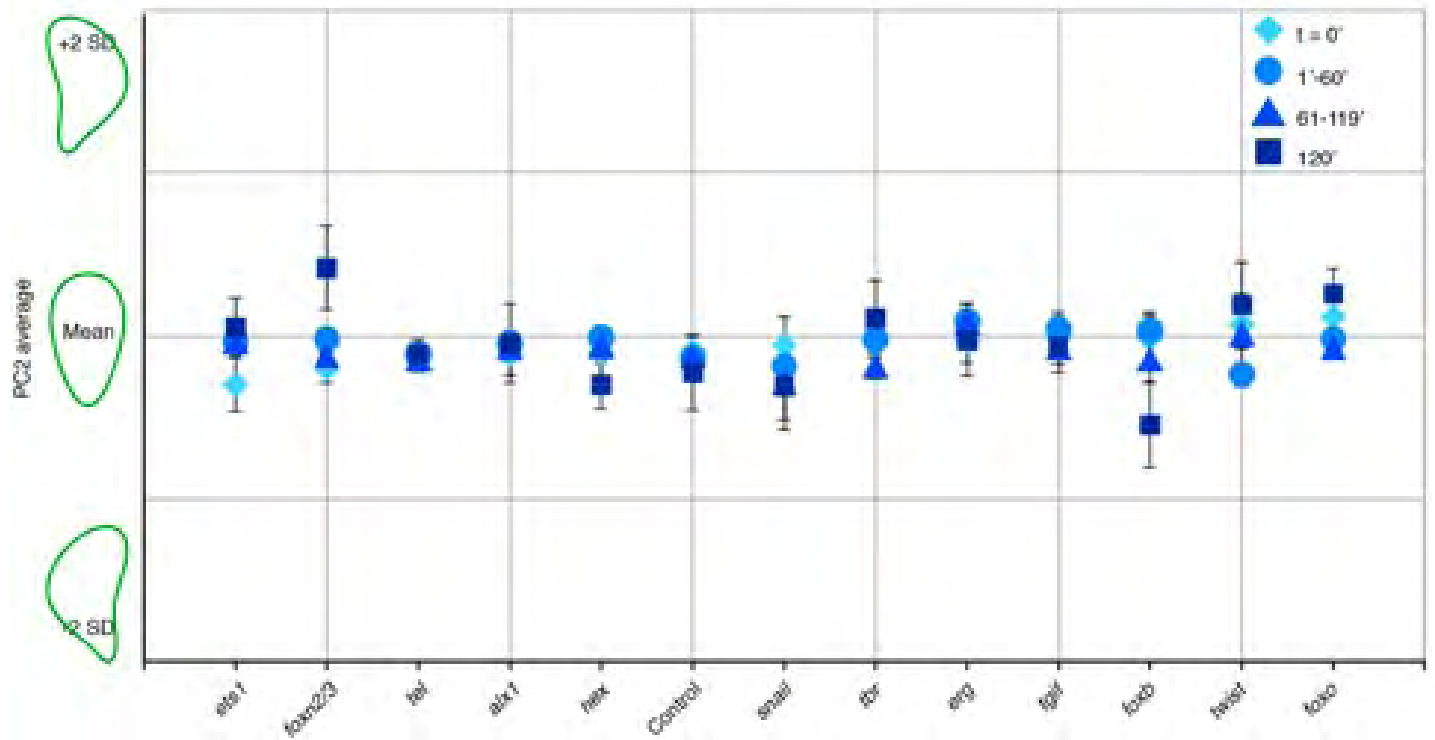

**Fig. S1. PC2 represents lateral asymmetry of cell shape.** PC2 does not show significant variation over elapsed time or between TF knockdowns. Time (t) is in minutes. Error bars are s.e.m.

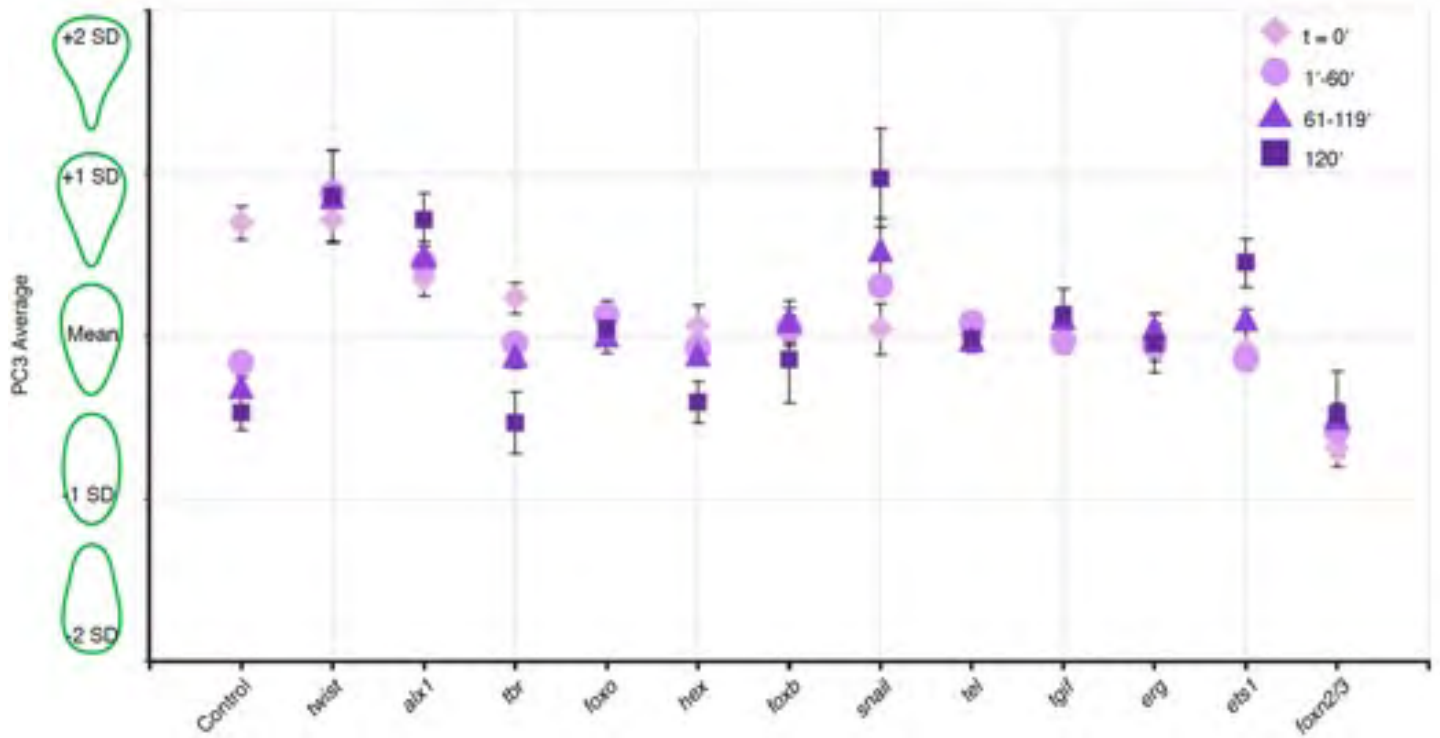

**Fig. S2. Foxn2/3 and tbr are required for apical-basal polarity.** PC3 represents cytoplasm distribution along the apical-basal axis from polarized apically,  $-2$  SD, to polarized basally with minor apical constriction,  $+2$  s.d. Foxn2/3 is the only knockdown to average more apical cytoplasm than the mean shape across all time points and tbr has progressively more apical cytoplasm over the time-course. Time is in minutes.

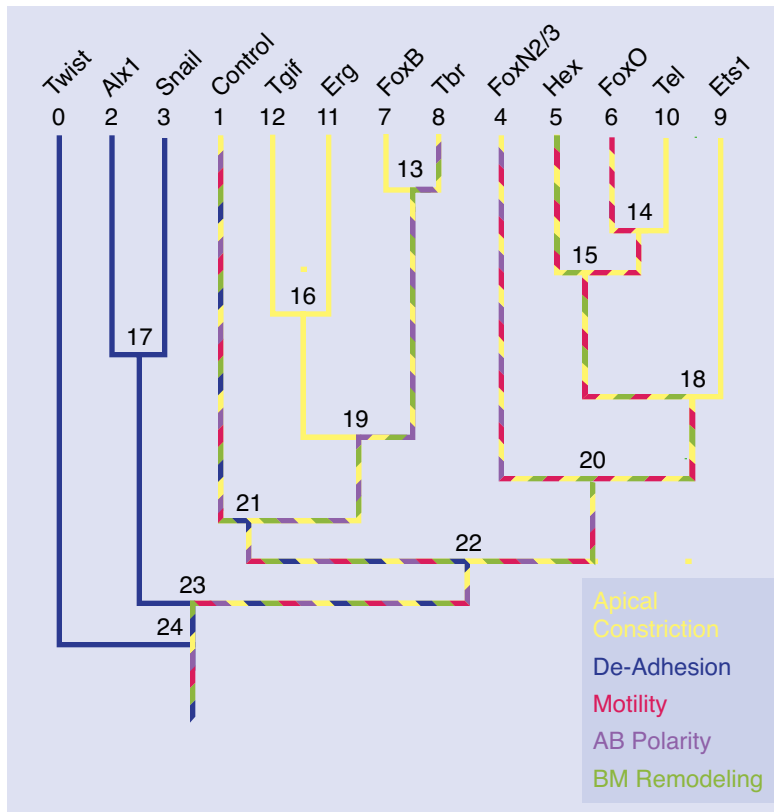

**Fig. S3. Unsupervised analysis of TF knockdown phenotypes.** K-means cluster analysis of displacement, principal component, and BM remodeling data. The hierarchical tree resulting from clustering shows the relationships between TFs based on total phenotypes. Five cellular behaviors of EMT are color coded; apical constriction (yellow), motility (red), apical-basal (AB) polarity (purple), de-adhesion (blue), and BM remodeling (green).

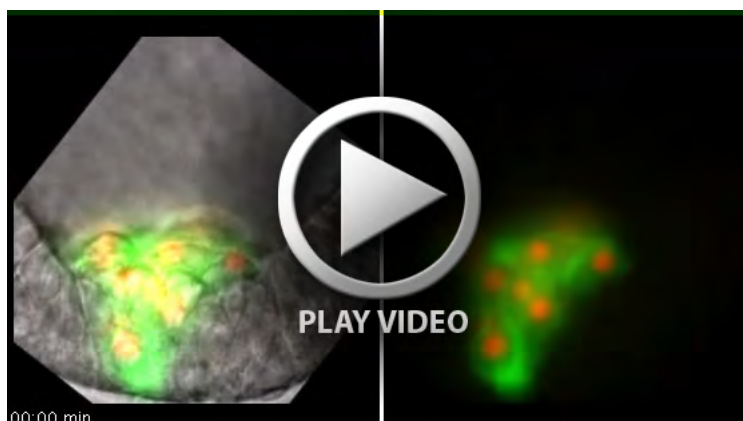

**Movie 1. Time-lapse of Control-1.** Green label is cell membrane (mem-GFP). Red label is nuclei (H2B-RFP). Left panel: DIC, mem-GFP, H2B-RFP. Right panel: mem-GFP, H2B-RFP.

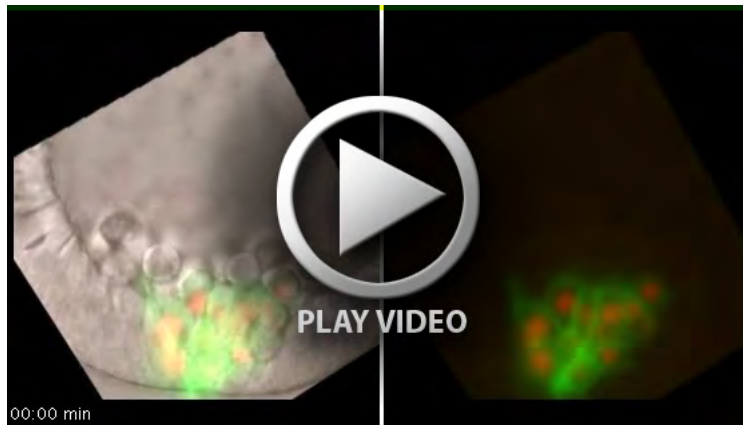

**Movie 2. Time-lapse of Control-2.** Green label is cell membrane (mem-GFP). Red label is nuclei (H2B-RFP). Left panel: DIC, mem-GFP, H2B-RFP. Right panel: mem-GFP, H2B-RFP.

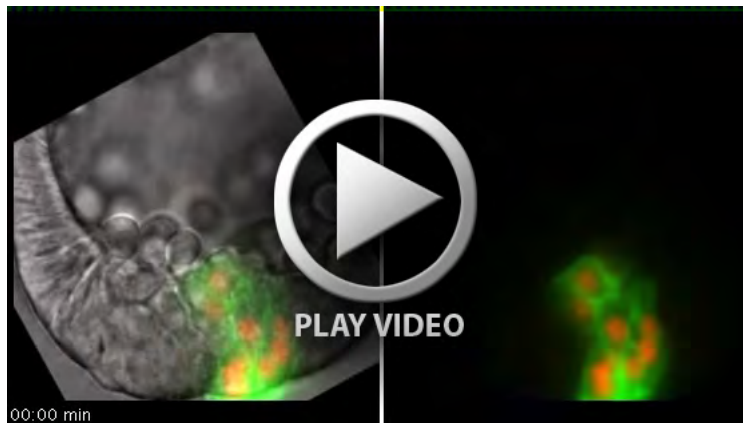

**Movie 3. Time-lapse of alx1 morpholino antisense oligonucleotide knockdown.** Green label is cell membrane (mem-GFP). Red label is nuclei (H2B-RFP). Left panel: DIC, mem-GFP, H2B-RFP. Right panel: mem-GFP, H2B-RFP.

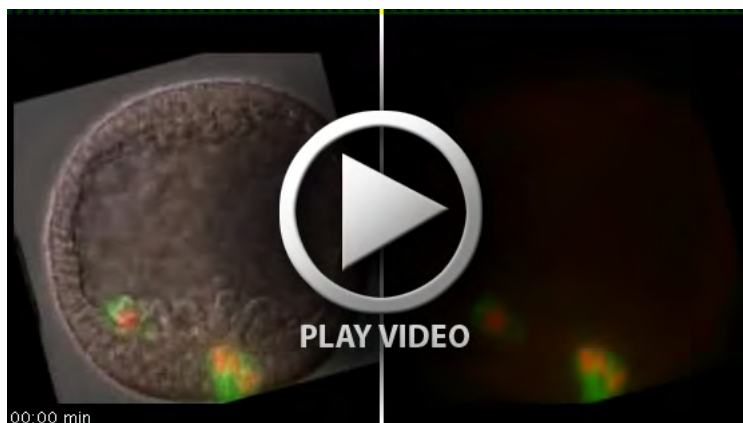

**Movie 4. Time-lapse of erg morpholino antisense oligonucleotide knockdown.** Green label is cell membrane (mem-GFP). Red label is nuclei (H2B-RFP). Left panel: DIC, mem-GFP, H2B-RFP. Right panel: mem-GFP, H2B-RFP.

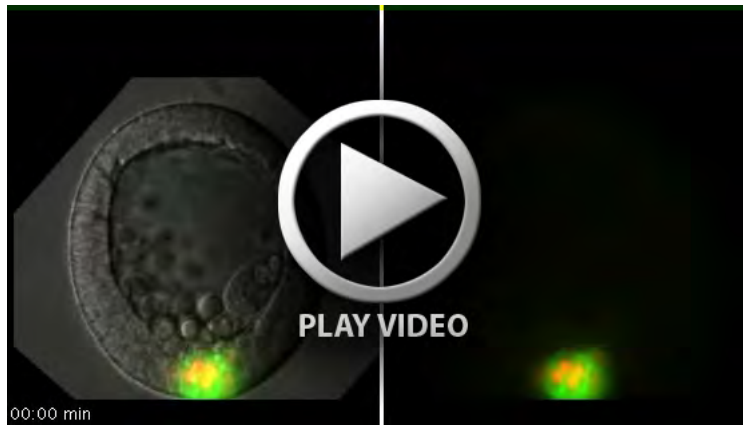

**Movie 5. Time-lapse of *ets1* dominant-negative knockdown.** Green label is cell membrane (mem-GFP). Red label is nuclei (H2B-RFP). Left panel: DIC, mem-GFP, H2B-RFP. Right panel: mem-GFP, H2B-RFP.

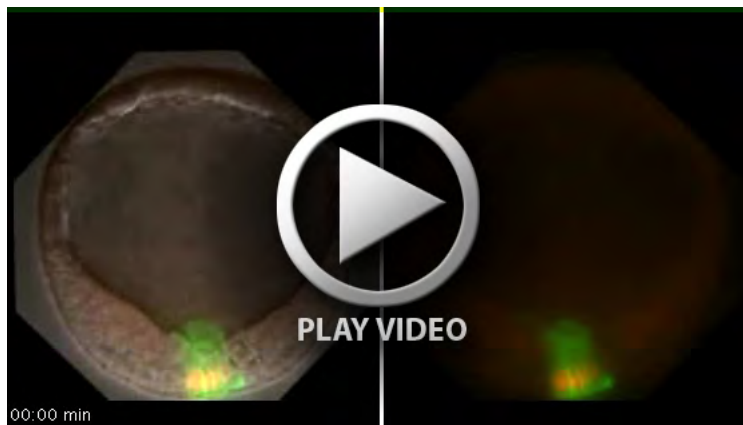

**Movie 6. Time-lapse of *foxb* morpholino antisense oligonucleotide knockdown.** Green label is cell membrane (mem-GFP). Red label is nuclei (H2B-RFP). Left panel: DIC, mem-GFP, H2B-RFP. Right panel: mem-GFP, H2B-RFP.

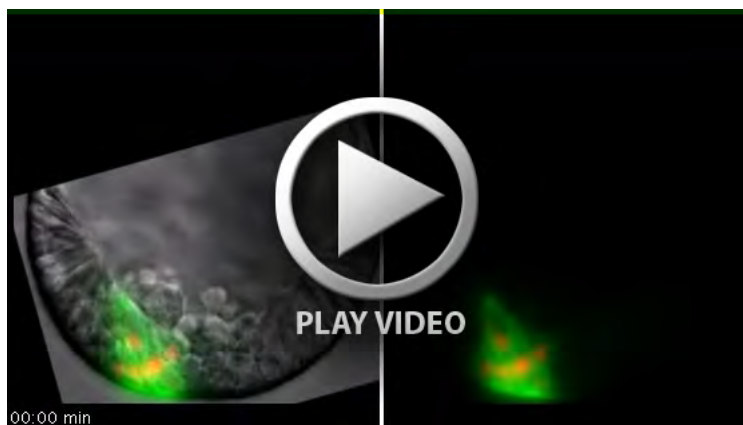

**Movie 7. Time-lapse of *foxn2/3* morpholino antisense oligonucleotide knockdown.** Green label is cell membrane (mem-GFP). Red label is nuclei (H2B-RFP). Left panel: DIC, mem-GFP, H2B-RFP. Right panel: mem-GFP, H2B-RFP.

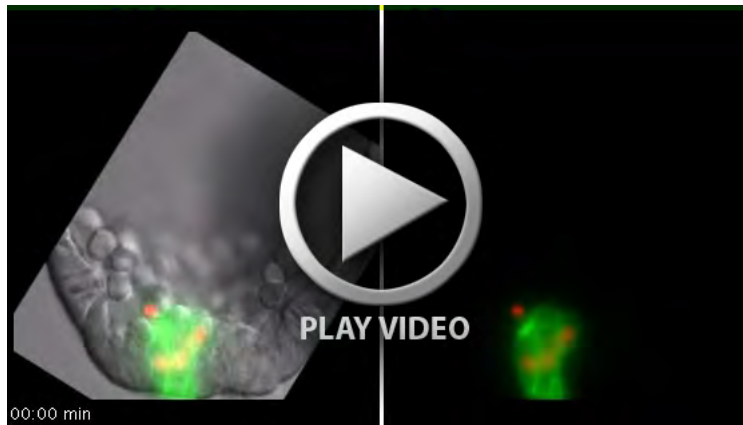

**Movie 8. Time-lapse of foxo morpholino antisense oligonucleotide knockdown.** Green label is cell membrane (mem-GFP). Red label is nuclei (H2B-RFP). Left panel: DIC, mem-GFP, H2B-RFP. Right panel: mem-GFP, H2B-RFP.

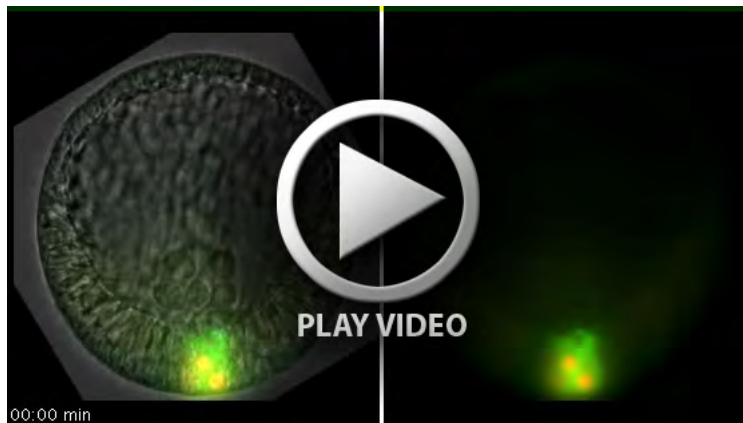

**Movie 9. Time-lapse of hex morpholino antisense oligonucleotide knockdown.** Green label is cell membrane (mem-GFP). Red label is nuclei (H2B-RFP). Left panel: DIC, mem-GFP, H2B-RFP. Right panel: mem-GFP, H2B-RFP.

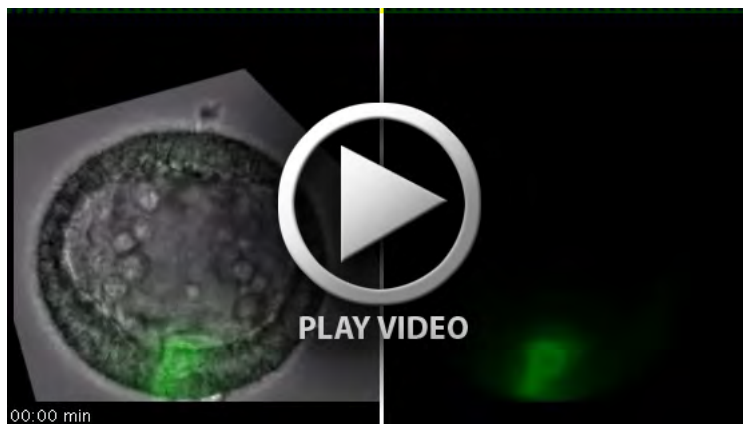

**Movie 10. Time-lapse of snail morpholino antisense oligonucleotide knockdown.** Green label is cell membrane (mem-GFP). Red label is nuclei (H2B-RFP). Left panel: DIC, mem-GFP, H2B-RFP. Right panel: mem-GFP, H2B-RFP.

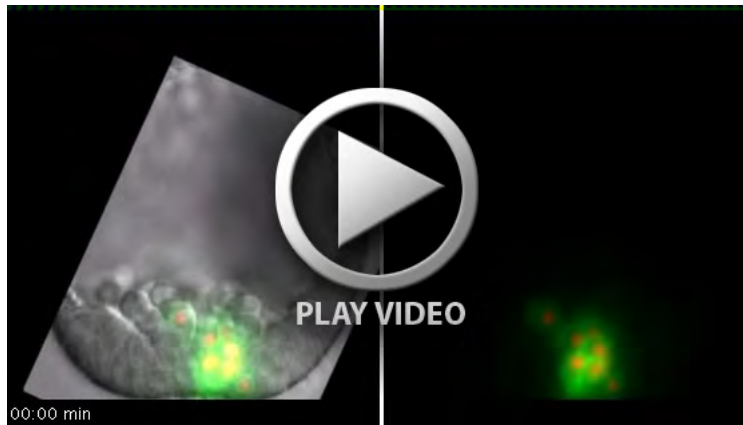

**Movie 11. Time-lapse of *tbr* morpholino antisense oligonucleotide knockdown.** Green label is cell membrane (mem-GFP). Red label is nuclei (H2B-RFP). Left panel: DIC, mem-GFP, H2B-RFP. Right panel: mem-GFP, H2B-RFP.

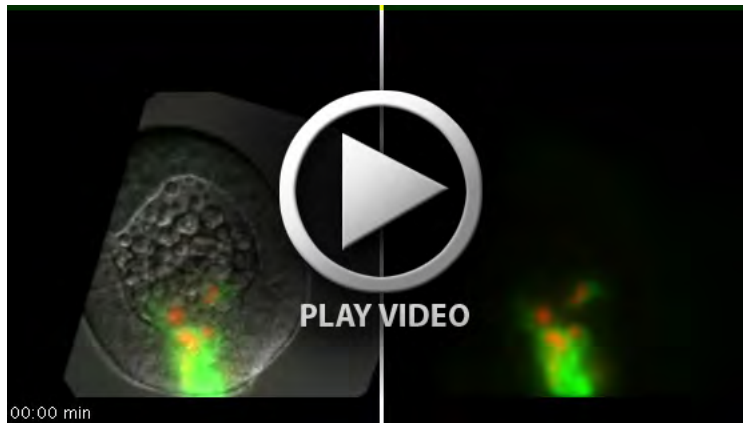

**Movie 12. Time-lapse of *tel* morpholino antisense oligonucleotide knockdown.** Green label is cell membrane (mem-GFP). Red label is nuclei (H2B-RFP). Left panel: DIC, mem-GFP, H2B-RFP. Right panel: mem-GFP, H2B-RFP.

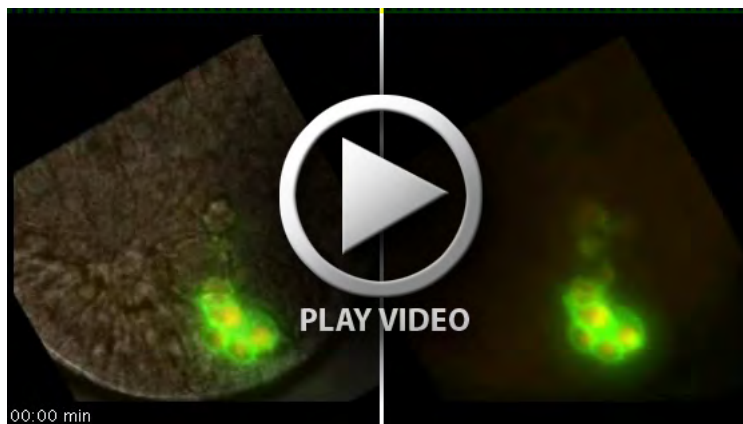

**Movie 13. Time-lapse of *tgif* morpholino antisense oligonucleotide knockdown.** Green label is cell membrane (mem-GFP). Red label is nuclei (H2B-RFP). Left panel: DIC, mem-GFP, H2B-RFP. Right panel: mem-GFP, H2B-RFP.

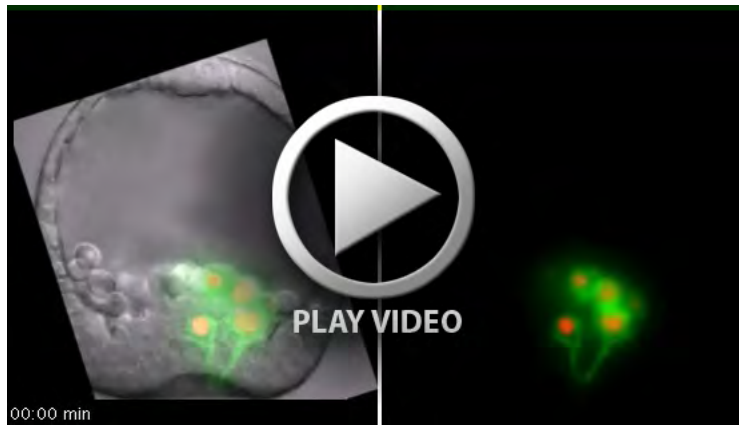

**Movie 14. Time-lapse of twist morpholino antisense oligonucleotide knockdown.** Green label is cell membrane (mem-GFP). Red label is nuclei (H2B-RFP). Left panel: DIC, mem-GFP, H2B-RFP. Right panel: mem-GFP, H2B-RFP.



**Table S1. Primer Sequences**

| Gene | Forward Primer                              | Reverse Primer                                   |
|------|---------------------------------------------|--------------------------------------------------|
| Dri  | 5' – GTAACACTGACTTTAGCGATCCTTCG – 3'        | 5' – GCTCAGATGGTGAACCTCAAACCTCTTC – 3'           |
| Erg  | 5' – TCCGACTGCCTTTGAGT<br>AAAGCAACGTCG – 3' | 5' – GCACTTCGTTTACGAGTCT<br>TTGTAATAGGAGTCC – 3' |
| FoxB | 5' – GGACCTTTGCACTTGTGCGAGAATCG – 3'        | 5' – GAGTCTCTCTTCTCTTGAGTCAGTG – 3'              |
| FoxO | 5' – TAAGGATCCATGGTTGATAACG – 3'            | 5' – TAAGAATTCTTAATGAACC – 3'                    |
| Hex  | 5' – AAGGATCCATGTGCGACTATACC – 3'           | 5' – AAGAATTCTCAAGCATCTCG – 3'                   |
| Tel  | 5' – GCTGCCACCAAAAAGTCAGCT – 3'             | 5' – GATGCCACAAAACAGACATCTC – 3'                 |
| Tgif | 5' – CACTTATTCTGGTTGTCTCCTGAGC – 3'         | 5' – TTACGGTAAGGCATGGAATTGCCTGG – 3'             |

**Table S2. Morpholino Sequences and Concentrations**

| Morpholino | Concentration | Antisense Oligo Sequence             |
|------------|---------------|--------------------------------------|
| LvDri1     | 2.0mM         | 5' – GTAAAGTCTACAGACATTCGTTTGC – 3'  |
| LvDri2     | 1.5mM         | 5' – CGCGGTGGTTCACCCGAAAACCGAA – 3'  |
| LvErg1     | 0.75mM        | 5' – AATAATCACCAATCGTACACGACGT – 3'  |
| LvErg2     | 0.5mM         | 5' – GCTTTACTCAAAGGCAGTCGGATA – 3'   |
| LvFoxB1    | 0.3mM         | 5' – CTGGTATTTACAGAAAAGTCATGC – 3'   |
| LvFoxB2    | 0.5mM         | 5' – CCCCTTCTAAATAGATAACAATGGTC – 3' |
| LvFoxO1    | 1.0mM         | 5' – GGGTCGTTATCAACCATTTTGATGA – 3'  |
| LvFoxO2    | 0.75mM        | 5' – ATCCTAAATTGGGTCACAAGTACAC – 3'  |
| LvHex1     | 2.0mM         | 5' – TGCACGAACAAGTATCCAGAAATGC – 3'  |
| LvHex2     | 1.5mM         | 5' – GGTGCTGAACTTTACAAACAACCTCT – 3' |
| LvTel1     | 0.75mM        | 5' – ATCGTTCTTGGTCCTGGGCAGTTCC – 3'  |
| LvTel2     | 1.0mM         | 5' – ATGGTTCCTGGTCTTGTGAACCTGA – 3'  |
| LvTgif1    | 0.5mM         | 5' – ATCTTTCTTTTGATAAATCCGCATC – 3'  |
| LvTgif2    | 1.0mM         | 5' – CGTATGTTGACTTTTTTCGCAGTGTT – 3' |

**Table S3. Sea urchin TFs required for EMT.**

| Sea Urchin EMT - TF | TF Family              | Human Homologues TF Family Members     | Vertebrate evidence of EMT relationship                                      | Type of Evidence | Citation Examples                              |
|---------------------|------------------------|----------------------------------------|------------------------------------------------------------------------------|------------------|------------------------------------------------|
| Alx1                | Homeobox               | ALX1 (CART1, FND3)                     | promotes EMT via SNAI1                                                       | direct           | PMID: 23288509                                 |
|                     |                        | ALX3 (FND1)                            | upregulated in mesenchyme, craniofacial disorder                             | indirect         | PMID: 23181698, 20534379, 9676189              |
|                     |                        | ALX4 (FND2)                            | gastric cancer metastasis, mammary cancer metastasis, craniofacial disorder  | indirect         | PMID: 22017425, 20145299, 11903336             |
| Ets1                | ETS (ETS subfamily)    | ETS1 (ETS-1, EWSR2)                    | inhibits ECM production, required for neural crest EMT, breast carcinoma EMT | direct           | PMID: 22829018, 17987123, 9247254              |
|                     |                        | ETS2                                   | Upregulates MMP-2 in trophoblast invasion, breast cancer metastasis/invasion | indirect         | PMID: 19939245, 9639404, 9500466, 16380248     |
| Tel                 | ETS (TEL subfamily)    | ETV6 (TEL, TEL/ABL)                    | myeloid malignancy, fusion protein in malignant leukemia                     | indirect         | PMID: 22823977, 19287094                       |
|                     |                        | ETV7 (TEL2, TELB, TEL-2)               | B-cell malignancy, hematopoietic oncogenesis                                 | indirect         | PMID: 15743832, 16234363                       |
| Erg                 | ETS (ERG subfamily)    | ERG (erg-3, p55)                       | overexpression induces EMT in prostate cancer                                | direct           | PMID: 23027626, 21747944, 20713528             |
|                     |                        | FLI1 (EWSR2, SIC-1)                    | fusion protein in metastatic Ewing's sarcoma                                 | indirect         | PMID: 16204072, 9552022                        |
|                     |                        | FEV (HSRNAFEV, PET-1)                  | fusion protein in metastatic Ewing's sarcoma                                 | indirect         | PMID: 17620387                                 |
| Tbr                 | T-Box (TBR1 subfamily) | TBR1 (TBR-1, TES-56)                   | medulloblastoma                                                              | indirect         | PMID: 22832583                                 |
|                     |                        | EOMES (TBR2)                           | loss blocks EMT                                                              | direct           | PMID: 18171685                                 |
|                     |                        | TBX21 (T-PET, T-bet, TBET, TBLYM)      | metastasis of gastric cancer                                                 | indirect         | PMID: 22416188                                 |
| Hex                 | Homeobox               | HHEX (HEX, PRH, HMPH, PRHX)            | mesenchymal cell expression after EMT induction, malignant haematopoiesis    | indirect         | PMID: 21490434, 20676125                       |
| Tgif                | TALE Homeobox          | TGIF1 (TGIF, HPE4)                     | overexpression progresses urothelial carcinoma                               | indirect         | PMID: 22771156, 22728270                       |
|                     |                        | TGIF2                                  | required for gastrulation, overexpressed in ovarian cancer                   | indirect         | PMID: 20040491, 11006116                       |
| Snail               | Snail                  | SNAI1 (SNAIL, SNAIL1)                  | overexpression induces EMT, E-cadherin repressor                             | direct           | Reviewed in PMID: 23076049, 22945800, 17587826 |
|                     |                        | SNAI2 (SLUG, SNAIL2)                   | overexpression induces EMT, E-cadherin repressor                             | direct           | Reviewed in PMID: 19273255, 21665887           |
|                     |                        | SNAI3 (SMUC, SNAIL3)                   | thyroid carcinoma                                                            | indirect         | PMID: 22641097                                 |
| Twist               | Twist                  | TWIST1 (TWIST, bHLHa38)                | overexpression induces EMT, E-cadherin repressor                             | direct           | Reviewed in PMID: 19272800, 15640618           |
|                     |                        | TWIST2 (DERMO1, bHLHa39)               | overexpression induces EMT, E-cadherin repressor                             | direct           | PMID: 21602879, 22018873, 22103974             |
| FoxB                | Forkhead               | FOXB1 (FKH5)                           | expression pre-neural crest delamination                                     | indirect         | PMID: 8861101                                  |
|                     |                        | FOXB2 (FKH4)                           | expression in developing spleen and thymus                                   | indirect         | PMID: 7689224                                  |
| FoxO                | Forkhead               | FOXO1 (FKH1, FKHR, FOXO1A)             | colorectal cancer, malignant parathyroid carcinoma                           | indirect         | PMID: 21901254, 23001705                       |
|                     |                        | FOXO3 (FOXO2, FKHL1, FOXO3A)           | promotes cancer cell invasion                                                | indirect         | PMID: 19564415, 21965295                       |
|                     |                        | FOXO4 (AFX, AFX1, MLLT7)               | required for neural crest migration                                          | indirect         | PMID: 19895805                                 |
| FoxN2/3             | Forkhead               | FOXN2 (HTLF)                           | presomitic mesoderm                                                          | indirect         | PMID: 12351180                                 |
|                     |                        | FOXN3 (CHES1)                          | neural crest development, craniofacial defects                               | indirect         | PMID: 21050205, 17089409, 20691664             |
| Dri                 | ARID                   | ARID3A (BRIGHT, DRIL1, DRIL3, E2FBP1), | oncogenic, promotes fibrosis, required for gastrulation                      | indirect         | PMID: 11812999, 18583319, 15680369             |
|                     |                        | ARID3B (BDP, DRIL2),                   | malignant neuroblastoma, neural crest development                            | indirect         | PMID: 22751132, 16951138, 16530748             |

Each TF in the sea urchin EMT GRN has at least one human homologue. 8 homologues have been directly implicated in vertebrate EMT. 22 homologues have not been assayed for EMT regulation but are expressed in a tissue where this is an EMT event. PMID = PubMed Identifier.
